# Supplementary material for: The seasonal origins and ages of water provisioning streams and trees in a tropical montane cloud forest
Source: Copernicus journal article supplement (doi:10.5194/hess-2023-75), 2023-05-04
Supplement: Supplementary file 1 [file hess-2023-75-supplement.pdf]

**Supplement to: The seasonal origins and ages of water provisioning streams and trees in a tropical montane cloud forest**

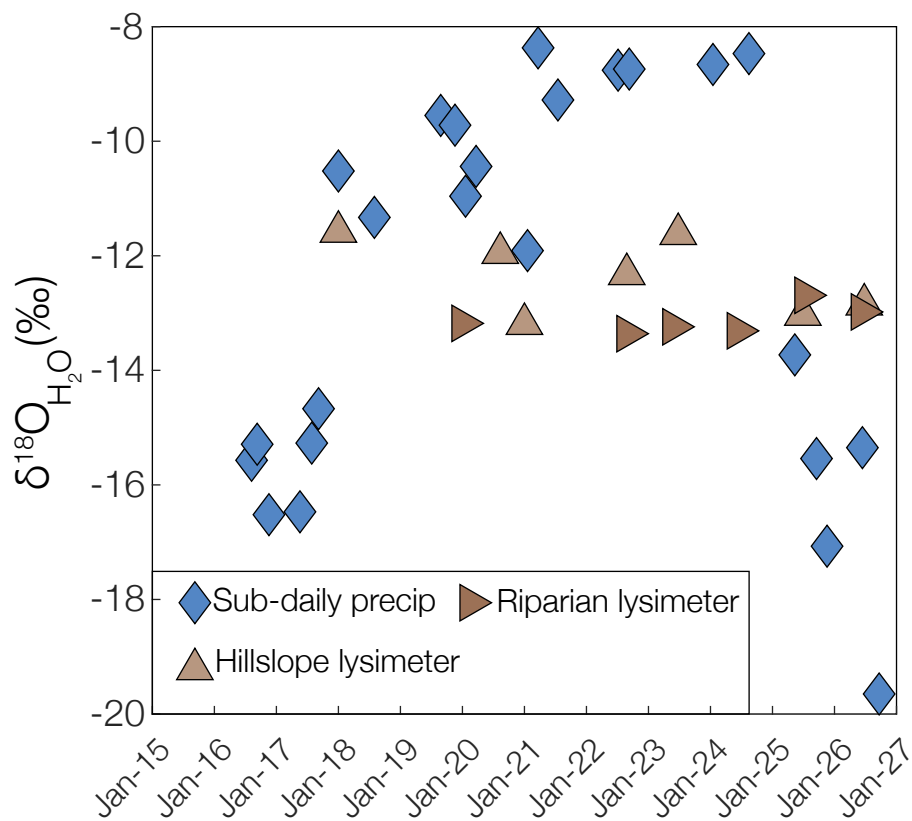

Figure S1. Precipitation and soil lysimeter water isotope ratios collected between 15 January 2017 and 27 January 2017 from a tropical montane cloud forested watershed in the southeastern Peruvian Andes mountains. Precipitation was collected in a bucket and sampled at least every 4 hours or more frequently.
